# Supplementary material
Source: PubMed Central journal article supplement (PMC6112244)

Supplementary Figure 1: SDS-PAGE and Stains-All staining of purified SIBLING proteins. The proteins samples were extracted and purified from rat long bone or rat incisor dentin and loaded onto 5-15% SDS-PAGE as previously described [12, 36]. The protein content in each SDS-PAGE gel is as follows: a) Five  $\mu\text{g}$  of BSP isolated from rat long bone, b) Three  $\mu\text{g}$  of OPN isolated from rat long bone, c) DMP1 fragments isolated from rat long bone including 4  $\mu\text{g}$  of the 37 kDa fragment and 4  $\mu\text{g}$  of the 57 kDa fragment, d) Ten  $\mu\text{g}$  of DMP1-PG isolated from rat long bone, e) Five  $\mu\text{g}$  of DSP isolated from rat incisor dentin, f) Five  $\mu\text{g}$  of DPP isolated from rat incisor dentin, and g) Four  $\mu\text{g}$  of DSP-PG isolated from rat incisor dentin. In all Figures Std is a molecular weight standard.

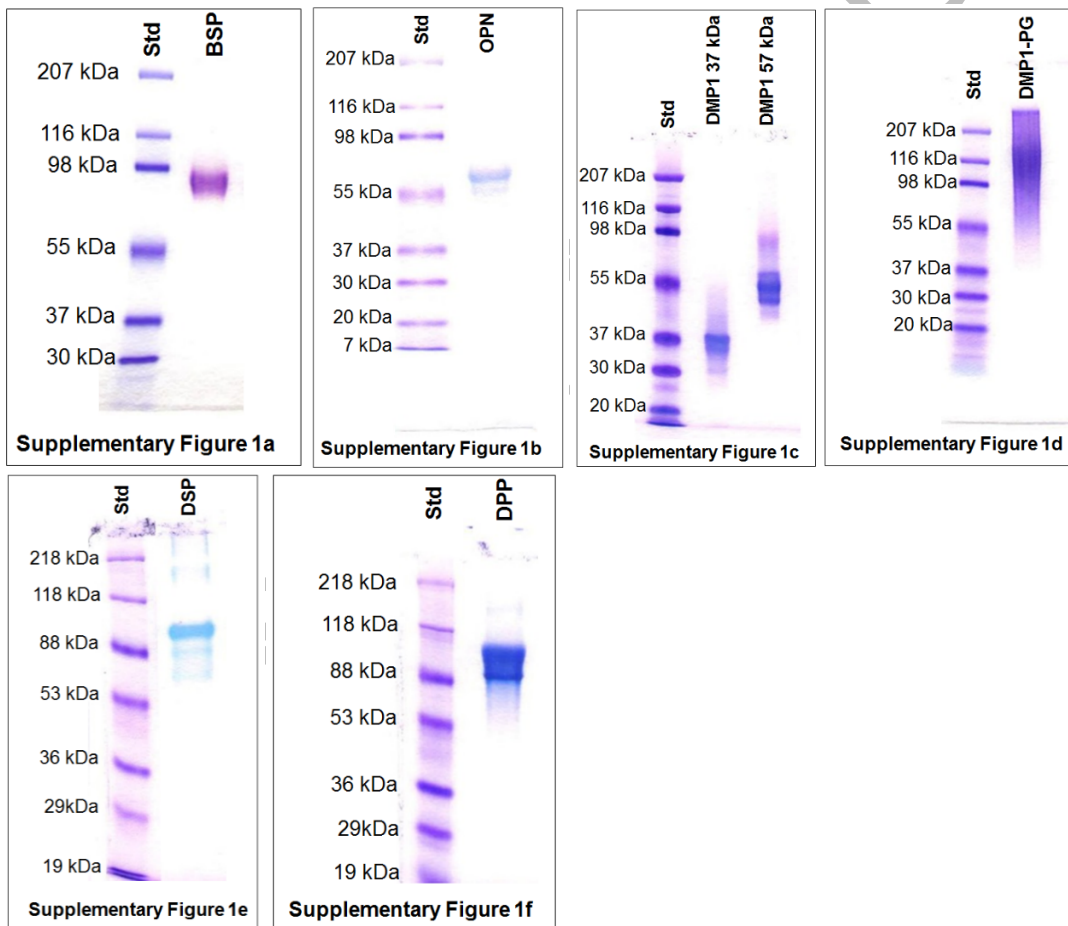

Supplement: NIHMS1501691-supplement-1.pdf [file NIHMS1501691-supplement-1.pdf]
